# Supplementary material for: Diversity of transition pathways in the course of crystallization into ice VII
Source: Royal Society of Chemistry journal article supplement (doi:10.1039/c4cp01616e), 2014-01-01
Supplement: c4cp01616e4.pdf [file c4cp01616e4.pdf]

**SUPPLEMENTARY INFORMATION**

**for**

**Diversity of transition pathways in the course of crystallization into ice VII**

Kenji Mochizuki, Kazuhiro Himoto and Masakazu Matsumoto\*

Department of Chemistry, Okayama University

3-1-1 Tsushimanaka, Kitaku, Okayama 700-8530, Japan

\*Corresponding author: Masakazu Matsumoto ([vitroid@gmail.com](mailto:vitroid@gmail.com))

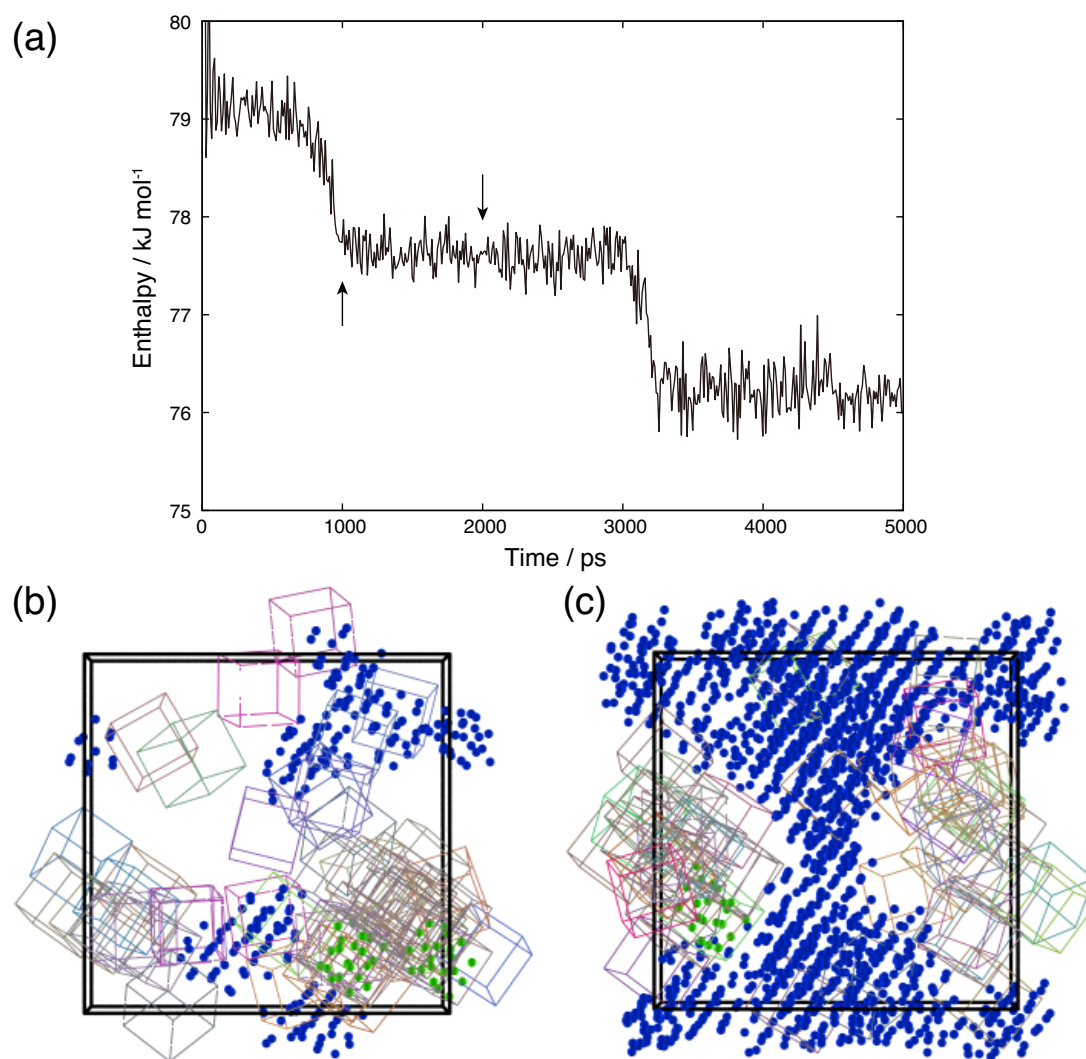

**Figure S1**

(a) Time evolution of enthalpy of the stepwise phase transition at 400K and at 10GPa using TIP4P/2005 water model ( $N=3456$ ).

(b) (c) Snapshots at 1000ps and 2000ps in Fig. S1(a), respectively. The cube represents the local structure loosely matched to a unit cell of the metastable phase ( $s < 10.0 \text{ \AA}^2$ ). A similar color is assigned for the unit cells with a similar orientation. Green and blue dots represent the molecules strictly matched to a unit cell of the metastable phase and an eightfold unit cell of ice VII ( $s < 2.0 \text{ \AA}^2$ ), respectively.
